# Supplementary material
Source: publisher site journal article supplement (https://www.spandidos-publications.com/3580/downloadSupplementary)

Figure S1. IL-17 upregulates the level of IL-17A and IL-17F. (A and B) HeLa cells were transfected with JAK2 siRNA. Then, the expression of IL-17A and IL-17F in HeLa cells were detected by RT-qPCR. (C and D) HeLa cells were transfected with STAT3 siRNA. Then, the expression of IL-17A and IL-17F in HeLa cells were detected by RT-qPCR. \*\*P<0.01. IL, interleukin; siRNA, small interfering RNA; NC, negative control; p-, phosphorylated-; RT-qPCR, reverse transcription-quantitative PCR.

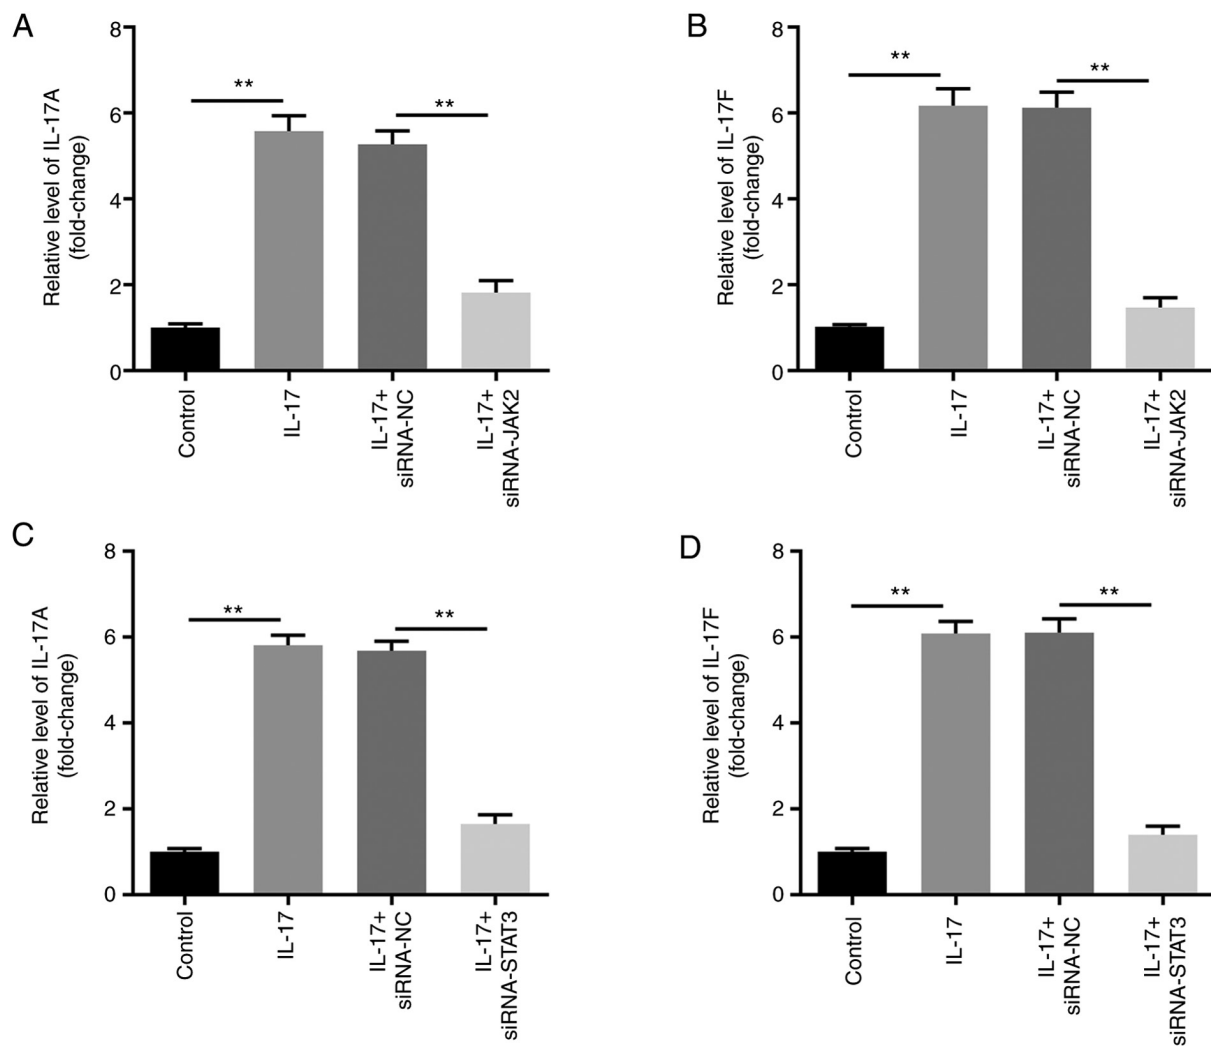

Supplement: Supplementary file 1 [file downloadSupplementary]
